# Supplementary material
Source: publisher figshare collection journal article supplement (https://acs.figshare.com/ndownloader/files/5711094)
Supplement: Supplementary file 1 [file 5711094]

# ic9804521.cif

# 1. SUBMISSION DETAILS

_publ_contact_author
;
         Arno Pfitzner
	   Anorganische Chemie
         Universitaet-GH Siegen 
         57068 Siegen
         Bundesrepublik Deutschland
	   arno@pferdle.chemie.uni-siegen.de
;
_publ_contact_author_phone        '049 271 740-2726'
_publ_contact_author_fax          '049 271 740-2555'
_publ_contact_author_email        'pfitzner@chemie.uni-siegen.de'
_publ_requested_journal           'Inorg. Chem.'
_publ_requested_coeditor_name     ?

_publ_contact_letter
;
  Deposition of data to be published in "Inorganic Chemistry".
;

#===========================================================================

# 2. TITLE AND AUTHOR LIST

_publ_section_title
;
  CuClCu~2~TeS~3~: Synthesis, Structure Determination and Raman Spectroscopic
  Characterization of a Novel Zincblende Derivative
;

loop_
_publ_author_name
_publ_author_address
;
    'Pfitzner, Arno'
;   Anorganische Chemie
    Universitaet-GH Siegen
    57068 Siegen
    Bundesrepublik Deutschland
;
#===========================================================================


data_CuClCu2TeS3 IC9804521
_cell_length_a                                7.361(1)       
_cell_length_b                                7.361(1)       
_cell_length_c                                10.401(1)      
_cell_angle_alpha                             90             
_cell_angle_beta                              90             
_cell_angle_gamma                             120            
_cell_volume                                  488.1(1)       
_cell_measurement_temperature                 '20 deg. C'
_cell_measurement_reflns_used                 25
_cell_measurement_theta_min                   ?              
_cell_measurement_theta_max                   ?              
_cell_formula_units_Z                         3
_symmetry_cell_setting                        trigonal
_symmetry_space_group_name_H-M                'R 3m'
loop_
_symmetry_equiv_pos_site_id                  
_symmetry_equiv_pos_as_xyz                   
1   x,y,z
2   -y,x-y,z
3   -y,-x,z
4   -x+y,-x,z
5   x,x-y,z
6   -x+y,y,z
7   2/3+x,1/3+y,1/3+z
8   2/3-y,1/3+x-y,1/3+z
9   2/3-y,1/3-x,1/3+z
10  2/3-x+y,1/3-x,1/3+z
11  2/3+x,1/3+x-y,1/3+z
12  2/3-x+y,1/3+y,1/3+z
13  1/3+x,2/3+y,2/3+z
14  1/3-y,2/3+x-y,2/3+z
15  1/3-y,2/3-x,2/3+z
16  1/3-x+y,2/3-x,2/3+z
17  1/3+x,2/3+x-y,2/3+z
18  1/3-x+y,2/3+y,2/3+z
loop_
_atom_type_symbol                            
_atom_type_oxidation_number                  
_atom_type_number_in_cell                    
_atom_type_scat_dispersion_real              
_atom_type_scat_dispersion_imag              
_atom_type_scat_source                       
Cu 0  54   0.320   1.265 International_Tables_Vol_C
Cl 0  18   0.148   0.159 International_Tables_Vol_C
Te 0  18  -0.531   1.675 International_Tables_Vol_C
S  0  54   0.125   0.123 International_Tables_Vol_C
_chemical_formula_sum                         'Cu3 Cl1 Te1 S3'
_chemical_formula_weight                      449.9          
_exptl_crystal_colour                         black
_exptl_crystal_description                    irregular
_exptl_crystal_size_min                       0.20
_exptl_crystal_size_mid                       0.25
_exptl_crystal_size_max                       0.25
_exptl_crystal_size_rad                       ?              
_exptl_crystal_density_diffrn                 4.59           
_exptl_crystal_density_meas                   ?              
_exptl_crystal_density_meas_temp              ?              
_exptl_crystal_density_method                 ?              
_exptl_crystal_F_000                          612            
_exptl_absorpt_correction_type                '\y-scans'
_exptl_absorpt_coefficient_mu                 15.351
_exptl_absorpt_correction_T_min               0.560
_exptl_absorpt_correction_T_max               0.816
_diffrn_measurement_device                    'four-circle diffractometer'
_diffrn_measurement_device_type               'NONIUS CAD4'
_diffrn_measurement_method                    '\w-scan'
_diffrn_radiation_probe                       'x-ray'
_diffrn_radiation_type                        'Mo K\a'
_diffrn_radiation_wavelength                  0.71073
_diffrn_standards_number                      3
_diffrn_standards_decay_%                     '<1%'
_diffrn_standards_interval_count              'every 100 reflections'
_diffrn_standards_interval_time               ?              
_diffrn_reflns_limit_h_min                    -11
_diffrn_reflns_limit_h_max                    11
_diffrn_reflns_limit_k_min                    -11
_diffrn_reflns_limit_k_max                    11
_diffrn_reflns_limit_l_min                    -16
_diffrn_reflns_limit_l_max                    16
_diffrn_reflns_number                         2932
_reflns_observed_criterion                    'I>0\s(I)'     
_diffrn_reflns_theta_min                      ?              
_diffrn_reflns_theta_max                      70
_reflns_number_total                          2932
_reflns_number_observed                       2932
_diffrn_reflns_av_R_equivalents               0.050
_diffrn_reflns_av_sigmaI/netI                 ?              
_refine_ls_structure_factor_coef              Fsqd           
_refine_ls_weighting_scheme                   sigma          
_refine_ls_weighting_details
_refine_ls_R_factor_obs                       0.0164         
_refine_ls_wR_factor_obs                      0.0435         
_refine_ls_R_factor_all                       0.0164         
_refine_ls_wR_factor_all                      0.0435         
_refine_ls_number_reflns                      561            
_refine_ls_number_parameters                  19             
_refine_ls_goodness_of_fit_obs                1.14           
_refine_ls_goodness_of_fit_all                1.14           
_refine_ls_shift/esd_max                      0.0004         
_refine_ls_shift/esd_mean                     0.0001         
_refine_diff_density_max                      1.47           
_refine_diff_density_min                      -0.68          
_refine_ls_extinction_method                  'B-C type 1 Lorentzian isotropic'
_refine_ls_extinction_coef                    0.41(2)
loop_
_atom_site_label                             
_atom_site_symmetry_multiplicity             
_atom_site_occupancy                         
_atom_site_fract_x                           
_atom_site_fract_y                           
_atom_site_fract_z                           
_atom_site_U_iso_or_equiv                    
Te    6 1          0           0           0.25        0.01354(8)
Cl    6 1          0           0           0.5705(1)   0.0172(2)
S     2 1          0.83625(5)  0.16375(5)  0.13812(7)  0.0138(2)
Cu    2 1          0.52391(5)  0.47609(5)  0.24593(4)  0.0249(1)
loop_
_atom_site_aniso_label                       
_atom_site_aniso_U_11                        
_atom_site_aniso_U_22                        
_atom_site_aniso_U_33                        
_atom_site_aniso_U_12                        
_atom_site_aniso_U_13                        
_atom_site_aniso_U_23                        
Te  0.0152(1)   0.0152(1)   0.0103(1)   0.00758(6)  0           0
Cl  0.0167(3)   0.0167(3)   0.0181(3)   0.0084(1)   0           0
S   0.0143(2)   0.0143(2)   0.0146(2)   0.0087(2)   0.00042(7) -0.00042(7)
Cu  0.0217(2)   0.0217(2)   0.0266(2)   0.0075(1)   0.00317(9) -0.00317(9)
loop_
_geom_bond_atom_site_label_1                 
_geom_bond_atom_site_label_2                 
_geom_bond_distance                          
_geom_bond_site_symmetry_1                   
_geom_bond_site_symmetry_2                   
Te      Cl        3.333(1)        .       .
Te      S         2.3901(5)       .       1_455
Te      S         2.3901(5)       .       2_545
Te      S         2.3901(5)       .       4_665
Cl      Te        3.333(1)        .       .
Cl      S         3.258(1)        .       37_445
Cl      S         3.258(1)        .       38_545
Cl      S         3.258(1)        .       40_555
Cl      Cu        2.4315(4)       .       19_445
Cl      Cu        2.4315(4)       .       20_555
Cl      Cu        2.4315(4)       .       22_455
S       Te        2.3901(5)       .       1_655
S       Cl        3.258(1)        .       19_554
S       Cu        2.3610(8)       .       37_544
S       Cu        2.3042(6)       .       2_655
S       Cu        2.3042(6)       .       4_665
Cu      Cl        2.4315(4)       .       37_554
Cu      S         2.3610(8)       .       19_455
Cu      S         2.3042(5)       .       2_655
Cu      S         2.3042(5)       .       4_665
Cu      Cu        3.1525(6)       .       2_655
Cu      Cu        3.1525(6)       .       4_665
loop_
_geom_angle_atom_site_label_1                
_geom_angle_atom_site_label_2                
_geom_angle_atom_site_label_3                
_geom_angle                                  
_geom_angle_site_symmetry_1                  
_geom_angle_site_symmetry_2                  
_geom_angle_site_symmetry_3                  
Cl      Te      S         119.13(2)       .       .       1_455
Cl      Te      S         119.13(2)       .       .       2_545
Cl      Te      S         119.13(2)       .       .       4_665
S       Te      S          98.31(2)       1_455   .       2_545
S       Te      S          98.31(2)       1_455   .       4_665
S       Te      S          98.31(2)       2_545   .       1_455
S       Te      S          98.31(2)       2_545   .       4_665
S       Te      S          98.31(2)       4_665   .       1_455
S       Te      S          98.31(2)       4_665   .       2_545
Te      Cl      S         138.42(2)       .       .       37_445
Te      Cl      S         138.42(2)       .       .       38_545
Te      Cl      S         138.42(2)       .       .       40_555
Te      Cl      Cu         92.16(3)       .       .       19_445
Te      Cl      Cu         92.16(3)       .       .       20_555
Te      Cl      Cu         92.16(3)       .       .       22_455
S       Cl      S          70.16(2)       37_445  .       38_545
S       Cl      S          70.16(2)       37_445  .       40_555
S       Cl      Cu         46.27(2)       37_445  .       19_445
S       Cl      Cu        107.66(3)       37_445  .       20_555
S       Cl      Cu        107.66(3)       37_445  .       22_455
S       Cl      S          70.16(2)       38_545  .       37_445
S       Cl      S          70.16(2)       38_545  .       40_555
S       Cl      Cu        107.66(3)       38_545  .       19_445
S       Cl      Cu         46.27(2)       38_545  .       20_555
S       Cl      Cu        107.66(3)       38_545  .       22_455
S       Cl      S          70.16(2)       40_555  .       37_445
S       Cl      S          70.16(2)       40_555  .       38_545
S       Cl      Cu        107.66(3)       40_555  .       19_445
S       Cl      Cu        107.66(3)       40_555  .       20_555
S       Cl      Cu         46.27(2)       40_555  .       22_455
Cu      Cl      Cu        119.86(1)       19_445  .       20_555
Cu      Cl      Cu        119.86(1)       19_445  .       22_455
Cu      Cl      Cu        119.86(1)       20_555  .       19_445
Cu      Cl      Cu        119.86(1)       20_555  .       22_455
Cu      Cl      Cu        119.86(1)       22_455  .       19_445
Cu      Cl      Cu        119.86(1)       22_455  .       20_555
Te      S       Cl        160.71(3)       1_655   .       19_554
Te      S       Cu        112.62(2)       1_655   .       37_544
Te      S       Cu        103.75(3)       1_655   .       2_655
Te      S       Cu        103.75(3)       1_655   .       4_665
Cl      S       Cu         48.09(2)       19_554  .       37_544
Cl      S       Cu         90.19(2)       19_554  .       2_655
Cl      S       Cu         90.19(2)       19_554  .       4_665
Cu      S       Cu        123.03(2)       37_544  .       2_655
Cu      S       Cu        123.03(2)       37_544  .       4_665
Cu      S       Cu        123.03(2)       2_655   .       37_544
Cu      S       Cu         86.32(2)       2_655   .       4_665
Cu      S       Cu        123.03(2)       4_665   .       37_544
Cu      S       Cu         86.32(2)       4_665   .       2_655
Cl      Cu      S          85.65(3)       37_554  .       19_455
Cl      Cu      S         107.59(2)       37_554  .       2_655
Cl      Cu      S         107.59(2)       37_554  .       4_665
Cl      Cu      Cu        149.93(1)       37_554  .       2_655
Cl      Cu      Cu        149.93(1)       37_554  .       4_665
S       Cu      S         121.32(2)       19_455  .       2_655
S       Cu      S         121.32(2)       19_455  .       4_665
S       Cu      Cu         95.63(2)       19_455  .       2_655
S       Cu      Cu         95.63(2)       19_455  .       4_665
S       Cu      S         121.32(2)       2_655   .       19_455
S       Cu      S         108.71(3)       2_655   .       4_665
S       Cu      Cu         97.39(2)       2_655   .       2_655
S       Cu      Cu         46.84(2)       2_655   .       4_665
S       Cu      S         121.32(2)       4_665   .       19_455
S       Cu      S         108.71(3)       4_665   .       2_655
S       Cu      Cu         46.84(2)       4_665   .       2_655
S       Cu      Cu         97.39(2)       4_665   .       4_665
Cu      Cu      Cu         60.00(1)       2_655   .       4_665
Cu      Cu      Cu         60.00(1)       4_665   .       2_655
#===========================================================================
